# Supplementary material for: Bright and persistent green emitting MgGa2O4:Mn2+ for phosphor converted white light emitting diodes
Source: Royal Society of Chemistry journal article supplement (doi:10.1039/d4dt02960g), 2024-11-18
Supplement: d4dt02960g1.pdf [file d4dt02960g1.pdf]

## Bright and Persistent Green Emitting $\text{MgGa}_2\text{O}_4:\text{Mn}^{2+}$ for Phosphor Converted White Light Emitting Diodes

Reshmi T. Parayil<sup>1,2</sup>, Santosh K. Gupta<sup>1,2\*</sup>, Malini Abraham<sup>3,4</sup>, Deepak Tyagi<sup>5</sup> Subrata Das<sup>3,4</sup>, Mohit Tyagi<sup>2,6</sup> N.S. Rawat,<sup>2,7</sup> Manoj Mohapatra<sup>1,2</sup>

<sup>1</sup>Radiochemistry Division, Bhabha Atomic Research Centre, Trombay, Mumbai-400085, India

<sup>2</sup>Homi Bhabha National Institute, Anushaktinagar, Mumbai – 400094, India

<sup>3</sup>Materials Science and Technology Division, CSIR-National Institute for Interdisciplinary Science and Technology, Thiruvananthapuram, Kerala 695019

<sup>4</sup>Academy of Scientific and Innovative Research (AcSIR), Ghaziabad-201002, India

<sup>5</sup>Chemistry Division, Bhabha Atomic Research Centre, Trombay, Mumbai-400085, India

<sup>6</sup>Technical Physics Division, Bhabha Atomic Research Centre, Trombay, Mumbai-400085, India

<sup>7</sup>Radiation Physics and Advisory Division, Bhabha Atomic Research Centre, Mumbai-400085.

\*To whom correspondence should be addressed. Electronic mail: \*santoshg@barc.gov.in/  
santufnd@gmail.com (SKG)

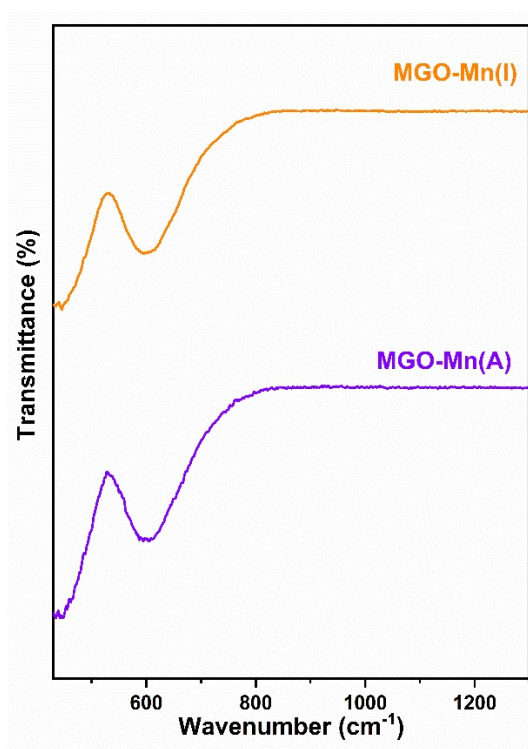

Figure S1: FTIR spectra of MGO-Mn(A) and MGO-Mn(I)

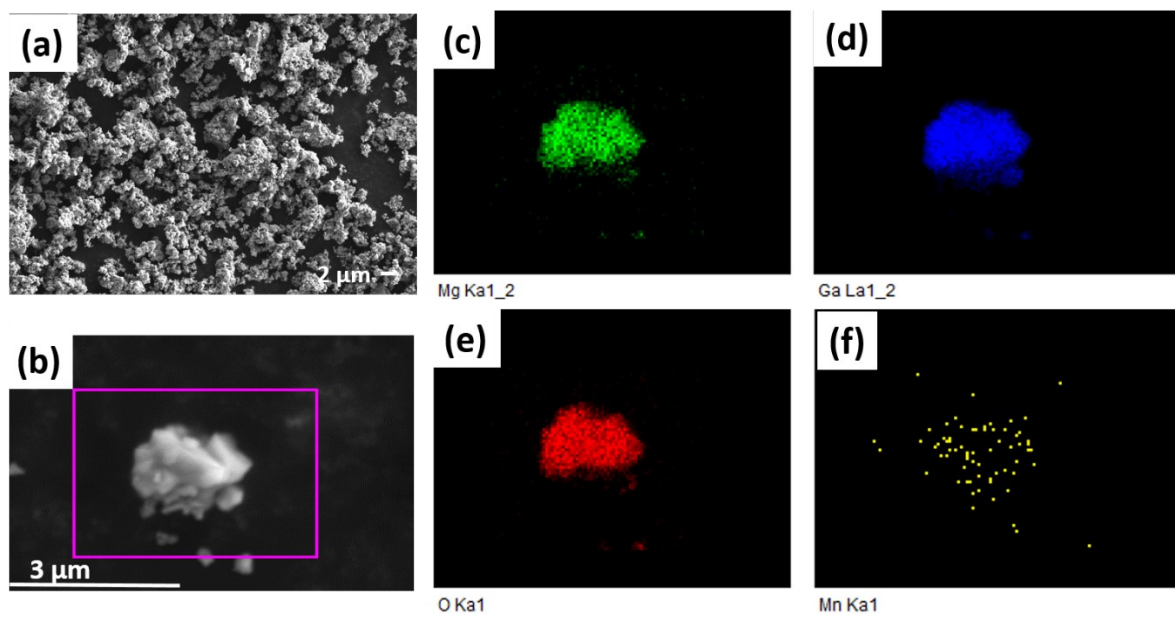

**Figure S2: (a) FESEM image (b-f) EDS mapping of MGO-Mn(R)**

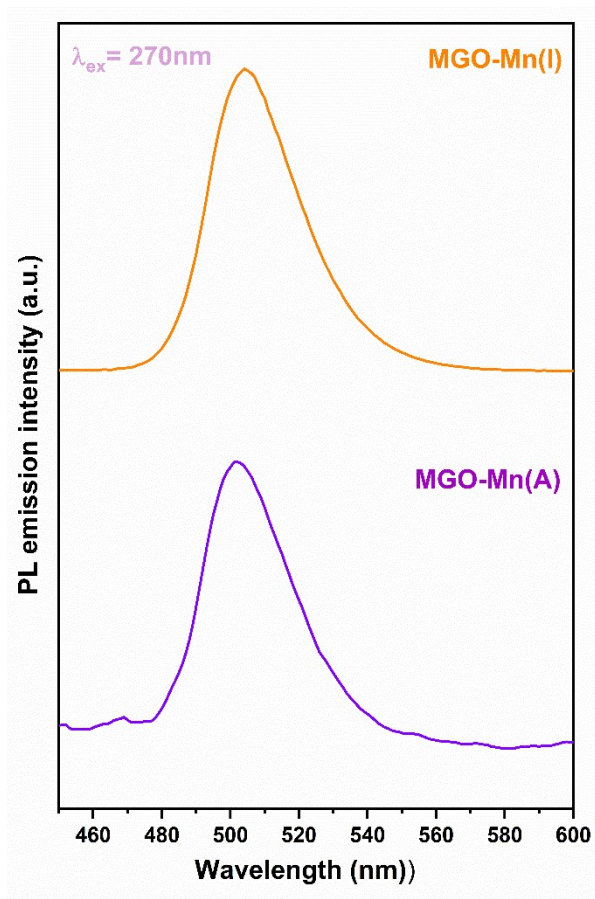

Figure S3: Emission spectra of MGO-Mn(A) and MGO-Mn(I)

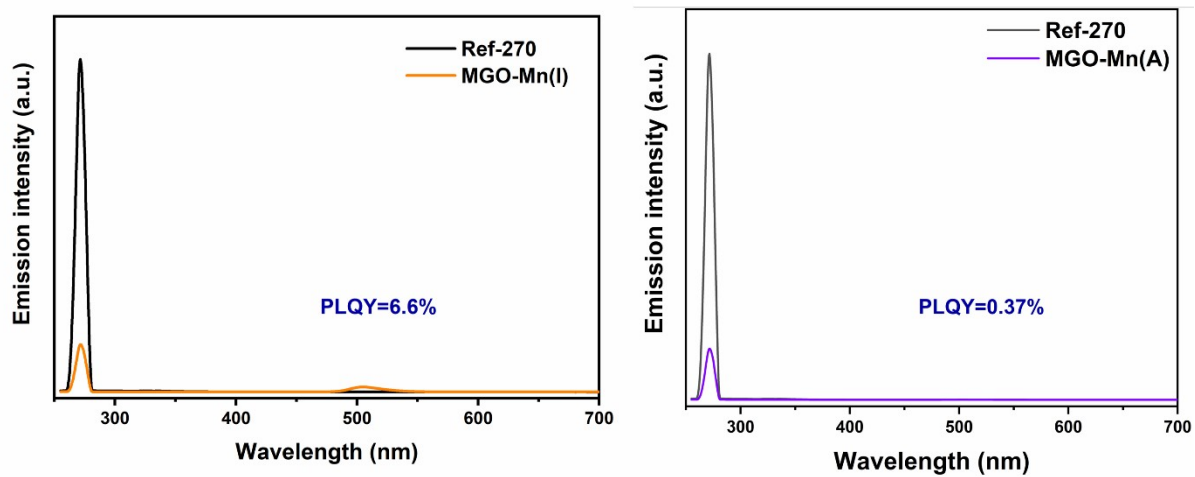

Figure S4: Spectra for quantum yield of MGO-Mn(A) and MGO-Mn(I)

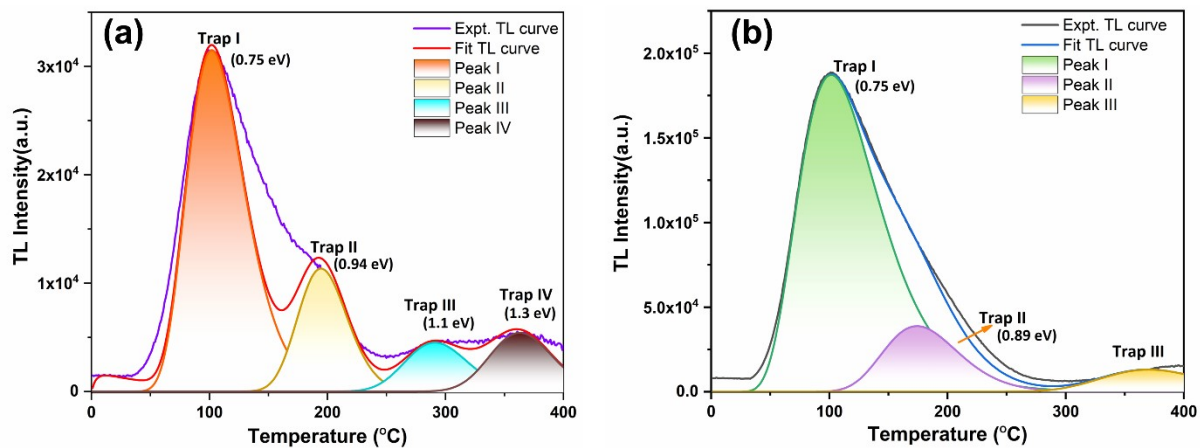

**Figure S5: Thermoluminescence spectra of (a) MGO-Mn(A) and (b) MGO-Mn(I)**
